# Supplementary material for: Unveiling the flavone-solubilizing effects of α-glucosyl rutin and hesperidin: probing structural differences through NMR and SAXS analyses
Source: Royal Society of Chemistry journal article supplement (doi:10.1039/d3fo03261b), 2023-01-01
Supplement: d3fo03261b1.pdf [file d3fo03261b1.pdf]

Supporting Information

## Unveiling the flavone-solubilizing effects of $\alpha$ -glucosyl rutin and hesperidin: Probing structural differences through NMR and SAXS analyses

*Kazunori Kadota<sup>1</sup>, \* Tero Kämäräinen<sup>1</sup>, Fumie Sakuma<sup>2</sup>, Keisuke Ueda<sup>2</sup>, Kenjiro Higashi<sup>2</sup>, Kunikazu Moribe<sup>2</sup>, Hiromasa Uchiyama<sup>1</sup>, Katsuhiko Minoura<sup>1</sup>, and Yuichi Tozuka<sup>1</sup>*

<sup>1</sup>Faculty of Pharmacy, Osaka Medical and Pharmaceutical University, 4-20-1 Nasahara, Takatsuki, Osaka 569-1094, Japan

<sup>2</sup>Graduate School of Pharmaceutical Sciences, Chiba University, 1-8-1 Inohana, Chuo-ku, Chiba 260-8675, Japan.

\*Corresponding author: [kazunori.kadota@ompu.ac.jp](mailto:kazunori.kadota@ompu.ac.jp)

### Contents

|                                             |    |
|---------------------------------------------|----|
| 1. Table of contents.....                   | 2  |
| 1.1 SEM images.....                         | 2  |
| 1.2 Powder X-ray diffraction patterns ..... | 3  |
| 2. Rutin-G SAXS Analysis .....              | 4  |
| 2.1 Polydisperse Sphere Model .....         | 4  |
| 3.2 Best-Fit Model Parameters .....         | 4  |
| 2.3 Supporting Figures.....                 | 5  |
| 3. Hsp-G SAXS Analysis .....                | 6  |
| 3.1 Core-Shell Sphere Model .....           | 6  |
| 3.2 Best-Fit Model Parameters .....         | 8  |
| 4. <sup>1</sup> H NMR spectra.....          | 9  |
| References.....                             | 10 |

# 1. Table of contents

## 1.1 SEM images

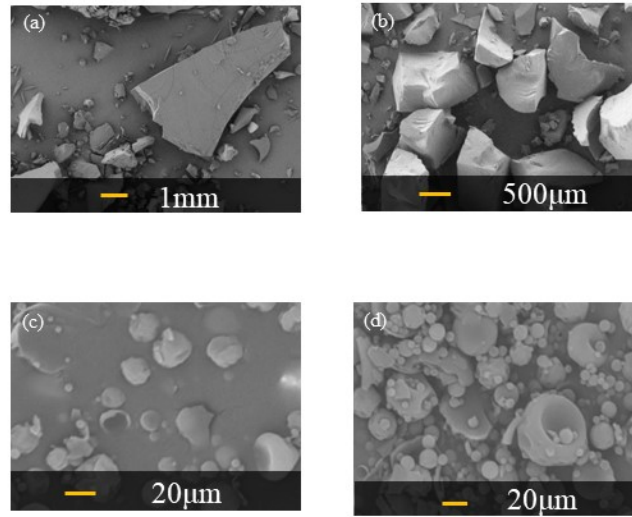

**Figure S1.** Scanning electron microscopy images of evaporated samples of (a) flavone/Hsp-G = 1:10 and (b) flavone/Rutin-G = 1:10, and of spray-dried particles of (c) flavone/Hsp-G = 1:10 and (d) flavone/Rutin-G = 1:10.

## 1.2 Powder X-ray diffraction patterns

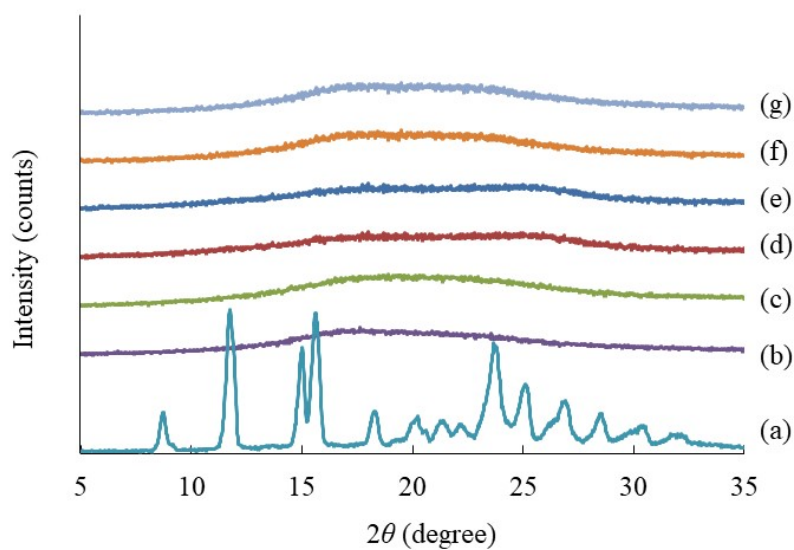

**Figure S2.** Powder X-ray diffraction patterns of (a) untreated flavone, (b) untreated Hsp-G, (c) untreated Rutin-G, (d) evaporated powder of flavone/Hsp-G (1:10), (e) evaporated powder of flavone/Rutin-G (1:10), (f) spray-dried particles of flavone/Hsp-G (1:10), and (g) spray-dried particles of flavone/Rutin-G (1:10).

## 2. Rutin-G SAXS Analysis

### 2.1 Polydisperse Sphere Model

The scattering intensity used for Rutin-G aggregates was modeled using the polydisperse sphere model, which gives the scattering for sphere with radius  $R$  as

$$I(q) = N \int_0^{\infty} p(R, \mu, \sigma) F^2(q, R) dR + BG, \#(S1)$$

where  $N$  is the number density of spheres, BG accounts for background scattering and

$$F(q, R) = 3V\Delta\rho \frac{\sin(qR) - qR\cos(qR)}{(qR)^3}, \#(S2)$$

$\Delta\rho$  is the scattering length density difference between the solvent and the spheres and  $V = (4/3)\pi R^3$  is the volume. The log-normal distribution was used to model the Rutin-G aggregate radius polydispersity:

$$p(R, \mu, \sigma) = \frac{1}{R\sigma\sqrt{2\pi}} \exp\left(-\frac{\ln(R/\mu)^2}{2\sigma^2}\right), \#(S3)$$

where  $\sigma^2$  and  $\mu$  are the variance and median of  $\ln(R)$ , respectively.

### 3.2 Best-Fit Model Parameters

**Table S1:** Best-fit parameters of the polydisperse sphere model for Rutin-G aggregates and reduced  $\chi^2$  statistic as Rutin-G concentration ( $c$ ) is varied:  $\sigma$  is the number distribution width parameter,  $\mu$  is the number distribution median,  $\Delta\rho$  is the scattering length density difference, and BG is the constant background term.

| $c$ (mg/mL) | $\chi^2$ | $\sigma$            | $\mu$ (Å)       | $\Delta\rho$ ( $\times 10^{-7}$ ) | BG ( $\times 10^{-7}$ ) |
|-------------|----------|---------------------|-----------------|-----------------------------------|-------------------------|
| 1           | 1.17     | $0.34 \pm 0.05$     | $7.1 \pm 1.4$   | $5.6 \pm 1.9$                     | $0 \pm 100$             |
| 2           | 1.38     | $0.34 \pm 0.01$     | $7.9 \pm 0.4$   | $7.0 \pm 0.6$                     | $0 \pm 3000$            |
| 3           | 1.08     | $0.336 \pm 0.007$   | $8.5 \pm 0.2$   | $7.5 \pm 0.3$                     | $11.6 \pm 0.6$          |
| 4           | 1.22     | $0.343 \pm 0.004$   | $8.6 \pm 0.2$   | $8.6 \pm 0.2$                     | $15.3 \pm 0.6$          |
| 5           | 1.11     | $0.347 \pm 0.003$   | $8.7 \pm 0.1$   | $9.5 \pm 0.2$                     | $21.6 \pm 0.5$          |
| 6           | 1.20     | $0.350 \pm 0.002$   | $8.84 \pm 0.09$ | $10.1 \pm 0.2$                    | $20.9 \pm 0.5$          |
| 8           | 1.27     | $0.355 \pm 0.002$   | $8.95 \pm 0.06$ | $11.5 \pm 0.1$                    | $24.1 \pm 0.5$          |
| 10          | 1.31     | $0.364 \pm 0.001$   | $8.90 \pm 0.05$ | $12.6 \pm 0.1$                    | $3.4 \pm 0.4$           |
| 15          | 1.99     | $0.3758 \pm 0.0009$ | $8.75 \pm 0.03$ | $14.60 \pm 0.08$                  | $5.2 \pm 0.4$           |

## 2.3 Supporting Figures

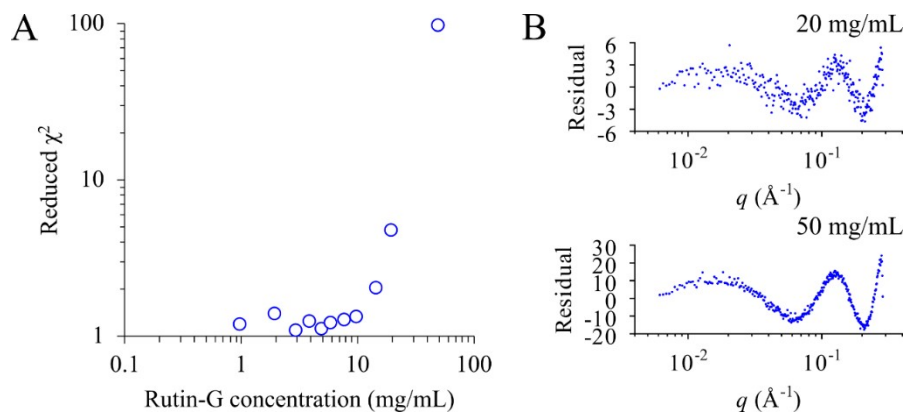

**Figure S3:** (A) Reduced  $\chi^2$  values of best-fit polydisperse sphere models for Rutin-G aggregates. (B) Normalized residuals for 20 and 50 mg/mL Rutin-G concentrations. Residuals for other

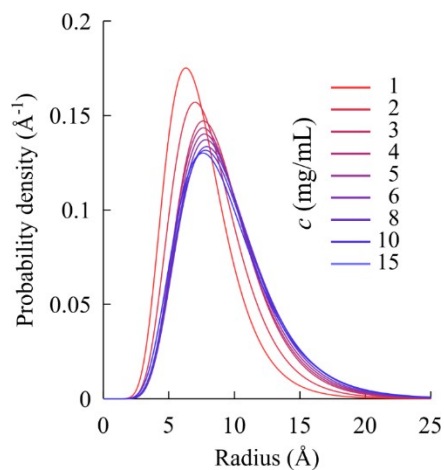

concentrations are shown in the main text.

**Figure S4:** Number size distributions of Rutin-G aggregates determined from SAXS data analysis using the polydisperse sphere model.

### 3. Hsp-G SAXS Analysis

Hsp-G at concentrations below the CMC was modeled using the monodisperse sphere model, while above the CMC the core-shell sphere model was used.

#### 3.1 Core-Shell Sphere Model

The scattering intensity used for Hsp-G micelles is given by<sup>1</sup>

$$I = P(q) + Aq^B + BG, \#(S4)$$

where  $Aq^B$  was used to include the contribution from the low- $q$  power law scattering, BG was used to account for the background scattering and  $P(q)$  is the core-shell sphere form factor given by

$$P(q) = \frac{scale}{V} F^2(q), \#(S5)$$

where  $V$  is the micelle volume and

$$F(q) = \frac{3}{V_{tot}} \left[ V_{core}(\rho_{core} - \rho_s) \frac{\sin(qR) - qR \cos(qR)}{(qR)^3} + V_{shell}(\rho_{shell} - \rho_s) \frac{\sin(qR_{tot}) - qR_{tot} \cos(qR_{tot})}{(qR_{tot})^3} \right], \#(S6)$$

where  $V_{tot} = (4/3)\pi(R+t)^3$ ,  $V_{core} = (4/3)\pi R^3$  and  $V_{shell} = (4/3)\pi[(R+t)^3 - R^3]$  are the total, core and shell volumes, respectively,  $\rho_s$ ,  $\rho_{core}$  and  $\rho_{shell}$  are the SLDs of the solvent, core and shell, respectively,  $R$  is the core radius,  $t$  is the shell thickness. The solvent and core SLDs were fixed to  $\rho_s = 9.429 \times 10^{-6}$  and  $\rho_{core} = 11.258 \times 10^{-6}$ , respectively.

Consistency between best-fit  $\rho_{shell}$  and  $\rho_{shell}$  calculated from the aggregation number of Hsp-G,

$$\rho_{shell} = \phi_{head} \rho_{head} + \phi_s \rho_s = \frac{N_{agg} v_{head}}{V_{shell}} \rho_{head} + \frac{N_s v_s}{V_{shell}} \rho_s, \#(S7)$$

was enforced by utilizing the fit constriction:

$$\rho_{shell} = \frac{V_{core} v_{head}}{V_{shell} v_{tail}} (\rho_{head} - \rho_s) + \rho_s, \#(S8)$$

where  $v_{head}$  and  $v_{tail}$  are Hsp-G head and tail group volumes estimated using CRY SOL<sup>2</sup> software package, and  $\rho_{head}$  is the head SLD of Hsp-G.

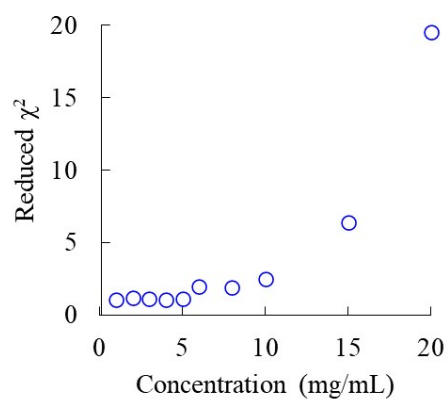

**Figure S5:** Goodness-of-fit value of monodisperse sphere model for Hsp-G SAXS data.

### 3.2 Best-Fit Model Parameters

**Table S2:** Best-fit parameters of the SAXS models used for Hsp-G aggregates and the reduced  $\chi^2$  statistic as Hsp-G concentration ( $c < \text{CMC}$ ) is varied.

| $c$ (mg/mL) | $\chi^2$ | $R$ (Å)        | $\Delta\rho$ ( $\times 10^{-7}$ Å $^{-2}$ ) | $A$                                          | $B$              | BG ( $\times 10^{-7}$ ) |
|-------------|----------|----------------|---------------------------------------------|----------------------------------------------|------------------|-------------------------|
| 1           | 1.04     | $9.1 \pm 0.1$  | $2.6 \pm 1.4$                               | $2.6 \times 10^{-18} \pm 5.4 \times 10^{-7}$ | $-5.99 \pm 0.04$ | $-0.01 \pm 1.42$        |
| 2           | 1.22     | $11.9 \pm 0.4$ | $1.5 \pm 0.2$                               | $1.7 \times 10^{-16} \pm 1.7 \times 10^{-6}$ | $-5.29 \pm 0.02$ | $3.72 \pm 47$           |
| 3           | 1.16     | $12.3 \pm 0.2$ | $1.8 \pm 0.1$                               | $8.4 \times 10^{-16} \pm 2.4 \times 10^{-6}$ | $-5.05 \pm 0.01$ | $6.49 \pm 40$           |

**Table S3:** Best-fit parameters of the SAXS models used for Hsp-G micelles and the reduced  $\chi^2$  statistic as Hsp-G concentration ( $c > \text{CMC}$ ) is varied.

| $c$ (mg/mL) | $\chi^2$ | $R$ (Å)         | $t$ (Å)       | $\rho_{\text{shell}}$ ( $\times 10^{-6}$ Å $^{-2}$ ) | scale ( $\times 10^{-6}$ ) | $A$ ( $\times 10^{-15}$ ) | $B$              | BG ( $\times 10^{-6}$ ) |
|-------------|----------|-----------------|---------------|------------------------------------------------------|----------------------------|---------------------------|------------------|-------------------------|
| 4           | 1.08     | $8.1 \pm 0.1$   | $4.7 \pm 0.2$ | $11.0 \pm 0.1$                                       | $1.4 \pm 0.1$              | $1.2 \pm 0.1$             | $-5.03 \pm 0.02$ | $0.91 \pm 0.03$         |
| 5           | 1.28     | $8.0 \pm 0.5$   | $6.1 \pm 1.3$ | $10.5 \pm 0.3$                                       | $2.8 \pm 0.7$              | $1.3 \pm 1100$            | $-5.1 \pm 0.5$   | $1.3 \pm 0.4$           |
| 6           | 2.01     | $8.0 \pm 0.3$   | $6.2 \pm 0.8$ | $10.4 \pm 0.19$                                      | $3.8 \pm 0.4$              | $6.2 \pm 640$             | $-4.8 \pm 0.6$   | $1.4 \pm 0.4$           |
| 8           | 1.89     | $8.0 \pm 0.3$   | $7.0 \pm 0.9$ | $10.3 \pm 0.1$                                       | $7.1 \pm 0.8$              | $6.0 \pm 540$             | $-4.9 \pm 0.4$   | $1.9 \pm 0.5$           |
| 10          | 2.32     | $8.1 \pm 0.2$   | $7.6 \pm 0.8$ | $10.2 \pm 0.1$                                       | $11.5 \pm 1.9$             | $7.9 \pm 870$             | $-4.9 \pm 0.5$   | $2.6 \pm 0.6$           |
| 15          | 5.43     | $8.10 \pm 0.08$ | $8.4 \pm 0.2$ | $10.05 \pm 0.02$                                     | $22.7 \pm 1.2$             | $6.6 \pm 120$             | $-4.6 \pm 0.2$   | $3.7 \pm 0.2$           |



## 4. $^1\text{H}$ NMR spectra

A

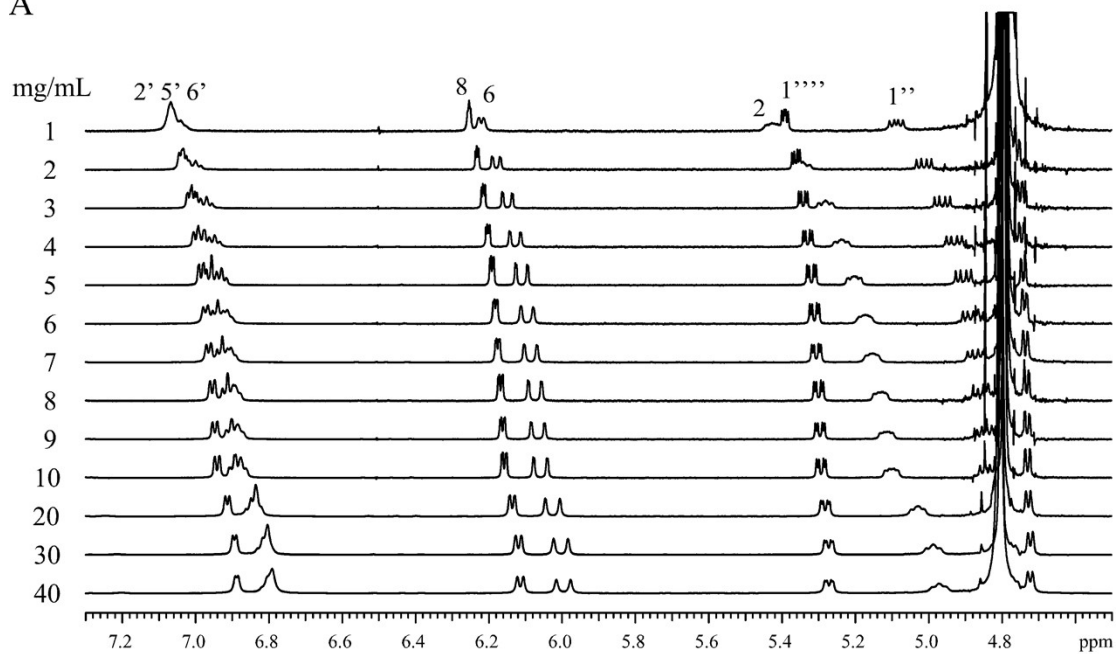

B

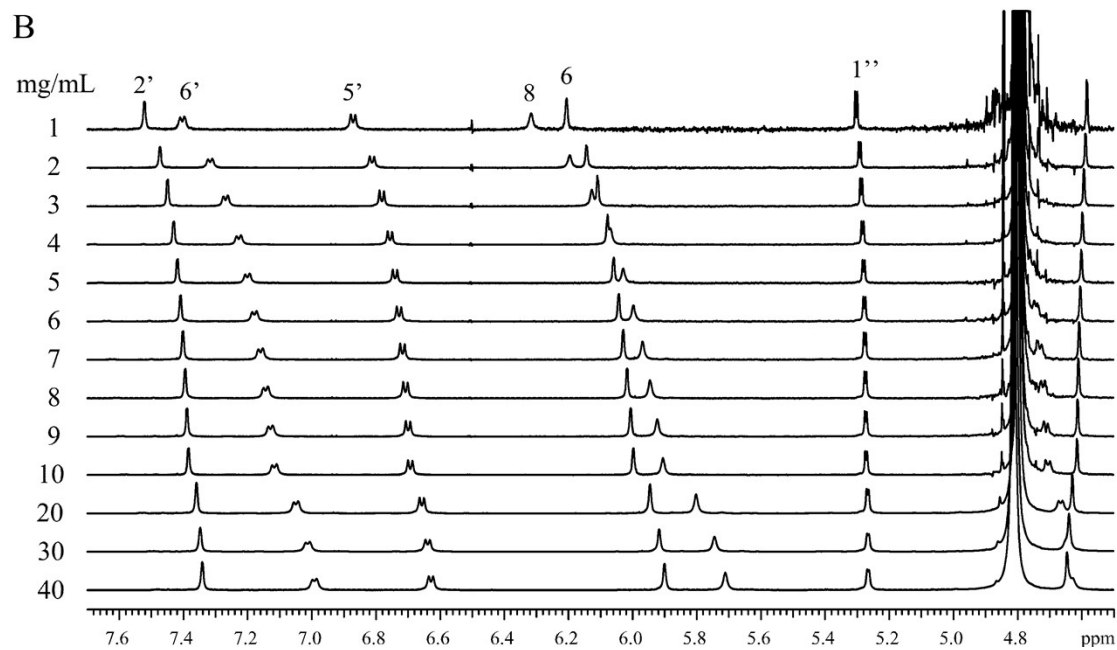

**Figure S6.**  $^1\text{H}$  NMR spectra of Hsp-G (A) and Rutin-G (B) solutions at concentrations 1–40 mg/mL in  $\text{D}_2\text{O}$  at 25 °C.

## References

1. Guinier, A.; Fournet, G. *Small-Angle Scattering of X-Rays*; John Wiley & Sons, Ltd, 1955.
2. Svergun, D.; Barberato, C.; Koch, M. H. CRY SOL - A Program to Evaluate X-Ray Solution Scattering of Biological Macromolecules from Atomic Coordinates. *J. Appl. Crystallogr.* **1995**, *28*, 768–773.
